# Supplementary material for: Evaluation of BPA and Bis-GMA Release from Recent Dental Composite Materials by LC-MS/MS
Source: MDPI journal article supplement (doi:10.3390/separations10080455), 2023-08-18
Supplement: s1 [file s1]

# Evaluation of BPA and Bis-GMA Release from Recent Dental Composite Materials by LC-MS/MS

Chromatograms with MS transitions of Bisphenol-A (BPA) and bisphenol A-Diglycidyl Methacrylate (Bis-GMA) released in 75% ethanol-water solution.

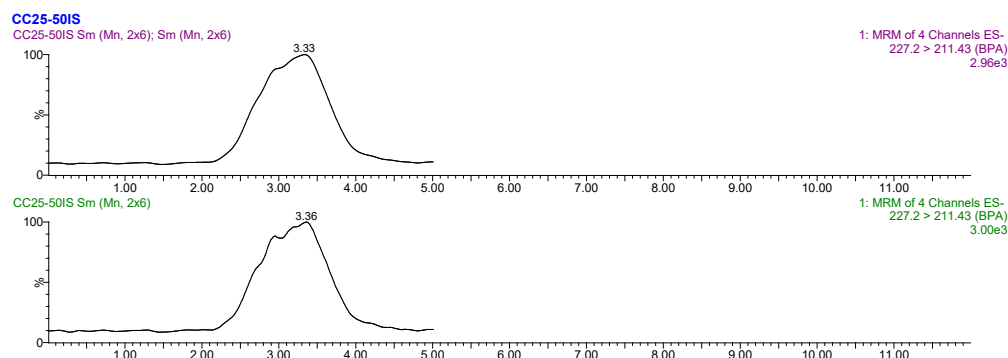

**Figure S1.** Liquid chromatography-tandem mass spectrometry (LC-MS/MS) analysis of BPA.

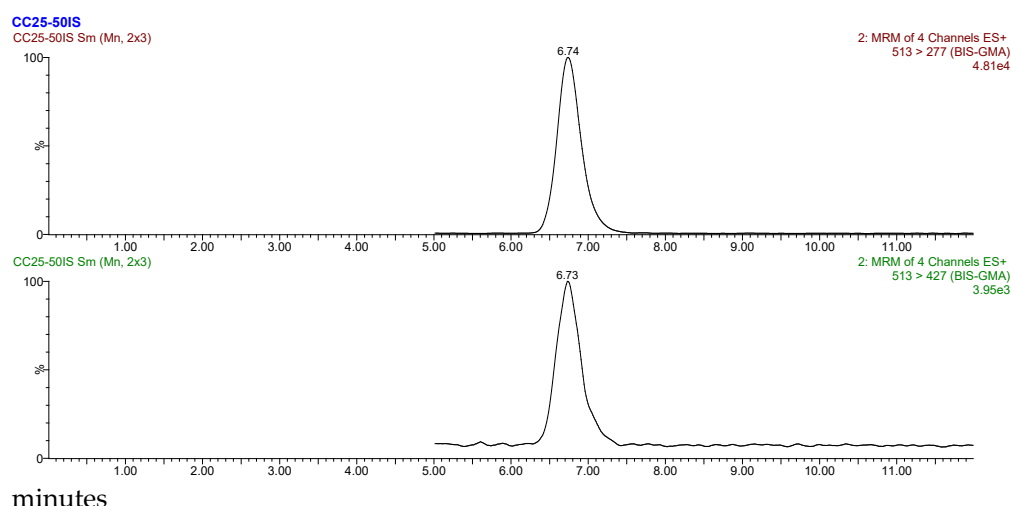

**Figure S2.** Liquid chromatography-tandem mass spectrometry (LC-MS/MS) analysis of Bis-GMA.

Analytical column: Kinetex C18 2.6  $\mu$ m particle size (150  $\times$  4.6 mm) with a Phenomenex pre-column (Tecnocroma, Portugal) at a 200  $\mu$ L/min flow rate. The column was kept at 30  $^{\circ}$ C, and the autosampler was maintained at room temperature ( $\pm$ 25  $^{\circ}$ C). Mobile phase: 90 % MeOH and 10 % aqueous solution of 5 mM ammonium acetate (pH 5).
